# Supplementary material for: Psychosocial Adjustment Factors Associated with Child-Parent Violence: The Role of Family Communication and Transgressive Attitude in Adolescents
Source: Preprints.org preprint supplement (doi:10.20944/preprints202312.0964.v1), 2023-12-13
Supplement: Supplementary file 1 [file supplementary]

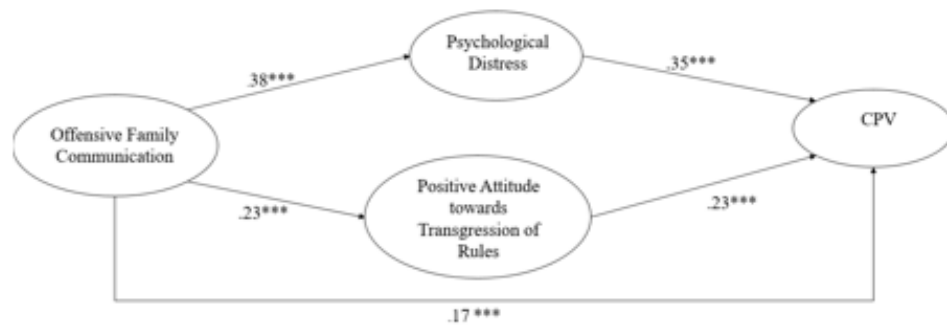

**Figure 2:** Final structural model with relationship coefficients and statistical significance. (Note: CPV: Child-to-parent violence).
