# Supplementary material for: Psychosocial Adjustment Factors Associated with Child-Parent Violence: The Role of Family Communication and Transgressive Attitude in Adolescents
Source: Preprints.org preprint supplement (doi:10.20944/preprints202312.0964.v1), 2023-12-13
Supplement: Supplementary file 2 [file supplementary]

**Table 2.** Parameter estimates, standard errors, and associated probability

| Variables                                               | Factorial loading<br>General Model |
|---------------------------------------------------------|------------------------------------|
| <b>Offensive Family Communication</b>                   |                                    |
| Mother Offensive Communication                          | 5.195 (.112) ***                   |
| Father Offensive Communication                          | 3.998 (.100) ***                   |
| <b>Psychological Distress</b>                           |                                    |
| Part 1 of Psychological Distress                        | 2.911 (.040) ***                   |
| Part 2 of Psychological Distress                        | 2.469 (.34) ***                    |
| Part 3 of Psychological Distress                        | 2.469 (.034) ***                   |
| <b>Positive Attitude Towards Transgression of Rules</b> |                                    |
| Item 4                                                  | .440 (.015) ***                    |
| Item 8                                                  | .649 (.015) ***                    |
| Item 9                                                  | .725 (.014) ***                    |
| Item 10                                                 | .608 (.015) ***                    |
| <b>Child-to-Parent Violence</b>                         |                                    |
| Child-to-parent Violence Mother                         | 2.631 (.092) ***                   |
| Child-to-parent Violence Father                         | 2.263 (.092) ***                   |

*Notes:* Robust statistics. Standard errors in parentheses. Factors were set to 1 robust statistics.

Standard errors in parentheses. Factors were set to 1. \*  $p < .05$ ; \*\*\*  $p < .001$ .
