# Supplementary material for: Psychosocial Adjustment Factors Associated with Child-Parent Violence: The Role of Family Communication and Transgressive Attitude in Adolescents
Source: Preprints.org preprint supplement (doi:10.20944/preprints202312.0964.v1), 2023-12-13
Supplement: Supplementary file 4 [file supplementary]

**Table 1.** Correlations, means and standard deviations

| Variables                    | 1         | 2        | 3        | 4        | 5        | 6        | 7        | 8        |
|------------------------------|-----------|----------|----------|----------|----------|----------|----------|----------|
| 1. Positive Attitude towards | 1         |          |          |          |          |          |          |          |
| 2. Transgression of Rules    |           | 1        |          |          |          |          |          |          |
| 3. Psychological Distress    | .130**    |          | 1        |          |          |          |          |          |
| 4. Physical Violence Mother  | .149**    | .175**   |          | 1        |          |          |          |          |
| 5. Verbal Violence Mother    | .222**    | .429**   | .396**   |          | 1        |          |          |          |
| 6. Physical Violence Father  | .150**    | .141**   | .647**   | .279**   |          | 1        |          |          |
| 7. Verbal Violence Father    | .207**    | .357**   | .314**   | .676**   | .439**   |          | 1        |          |
| 8. Offensive Communication   | .182**    | .343**   | .157**   | .334**   | .127**   | .244**   |          | 1        |
| 9. Mother                    |           |          |          |          |          |          |          |          |
| 10. Offensive Communication  | .145**    | .252**   | .099**   | .233**   | .132**   | .296**   | .691**   |          |
| 11. Father                   |           |          |          |          |          |          |          | 1        |
| M /SD                        | 1.58/.068 | 2.04/.85 | 1.06/.27 | 1.56/.66 | 1.07/.30 | 1.45/.64 | 2.02/.78 | 1.93/.79 |

Notes: \*\* $p < .01$ ; \*\*\* $p > .001$
