# Supplementary material for: Psychosocial Adjustment Factors Associated with Child-Parent Violence: The Role of Family Communication and Transgressive Attitude in Adolescents
Source: Preprints.org preprint supplement (doi:10.20944/preprints202312.0964.v1), 2023-12-13
Supplement: Supplementary file 5 [file supplementary]

**Table 3.** Indirect, direct, and total effects of the overall model.

|                                        | $\beta$ | Standard Errors<br>( <i>s</i> ) | <i>p</i> | IC 95% |      |
|----------------------------------------|---------|---------------------------------|----------|--------|------|
|                                        |         |                                 |          | LCL    | ULC  |
| <b>Indirect effects</b>                |         |                                 |          |        |      |
| OFC → MPS → Child-to-parent violence   | .131    | .009                            | < .001   | .113   | .150 |
| OFC → PATTR → Child-to-parent violence | .052    | .006                            | < .001   | .041   | .063 |
| <b>Direct effects</b>                  |         |                                 |          |        |      |
| OFC → Child-to-parent Violence         | .173    | .019                            | < .001   | .136   | .210 |
| <b>Total effects</b>                   |         |                                 |          |        |      |
| OFC → Child-to-parent Violence         | .357    | .019                            | < .001   | .306   | .408 |

Notes: OFC: Offensive Family Communication; PD: Psychological Distress; PATTR: Positive Attitude Towards Transgression of Rules
