# Supplementary figures and images for: Psychosocial Adjustment Factors Associated with Child-Parent Violence: The Role of Family Communication and Transgressive Attitude in Adolescents
Source: Preprints.org preprint supplement (doi:10.20944/preprints202312.0964.v1), 2023-12-13

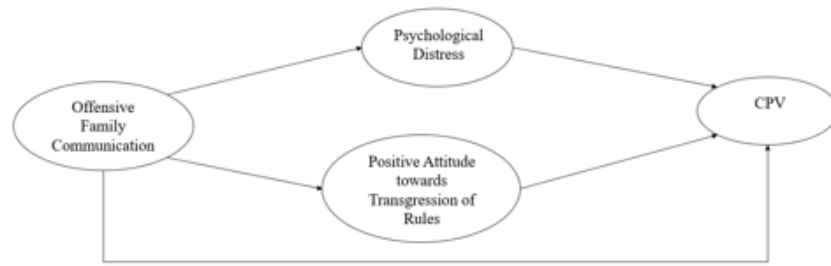

**Figure 1.** Theoretical model proposed (*Note:* CPV: Child-to-parent Violence)

Supplement: Supplementary file 3 [file supplementary]
